# Supplementary material for: Choosing and changing the analysis scale in non-inferiority trials with a binary outcome
Source: PubMed Central journal article supplement (PMC8847766; doi:10.1177/17407745211053790), 2021-10-24
Supplement: sj-pdf-1-ctj-10.1177_17407745211053790.pdf [file sj-pdf-1-ctj-10.1177_17407745211053790.pdf]

Figure S1. Results with  $p_t^* = p_c^*$ ,  $\delta_{RD} = -0.1$ , one-sided  $\alpha = 0.05$ , power=0.80

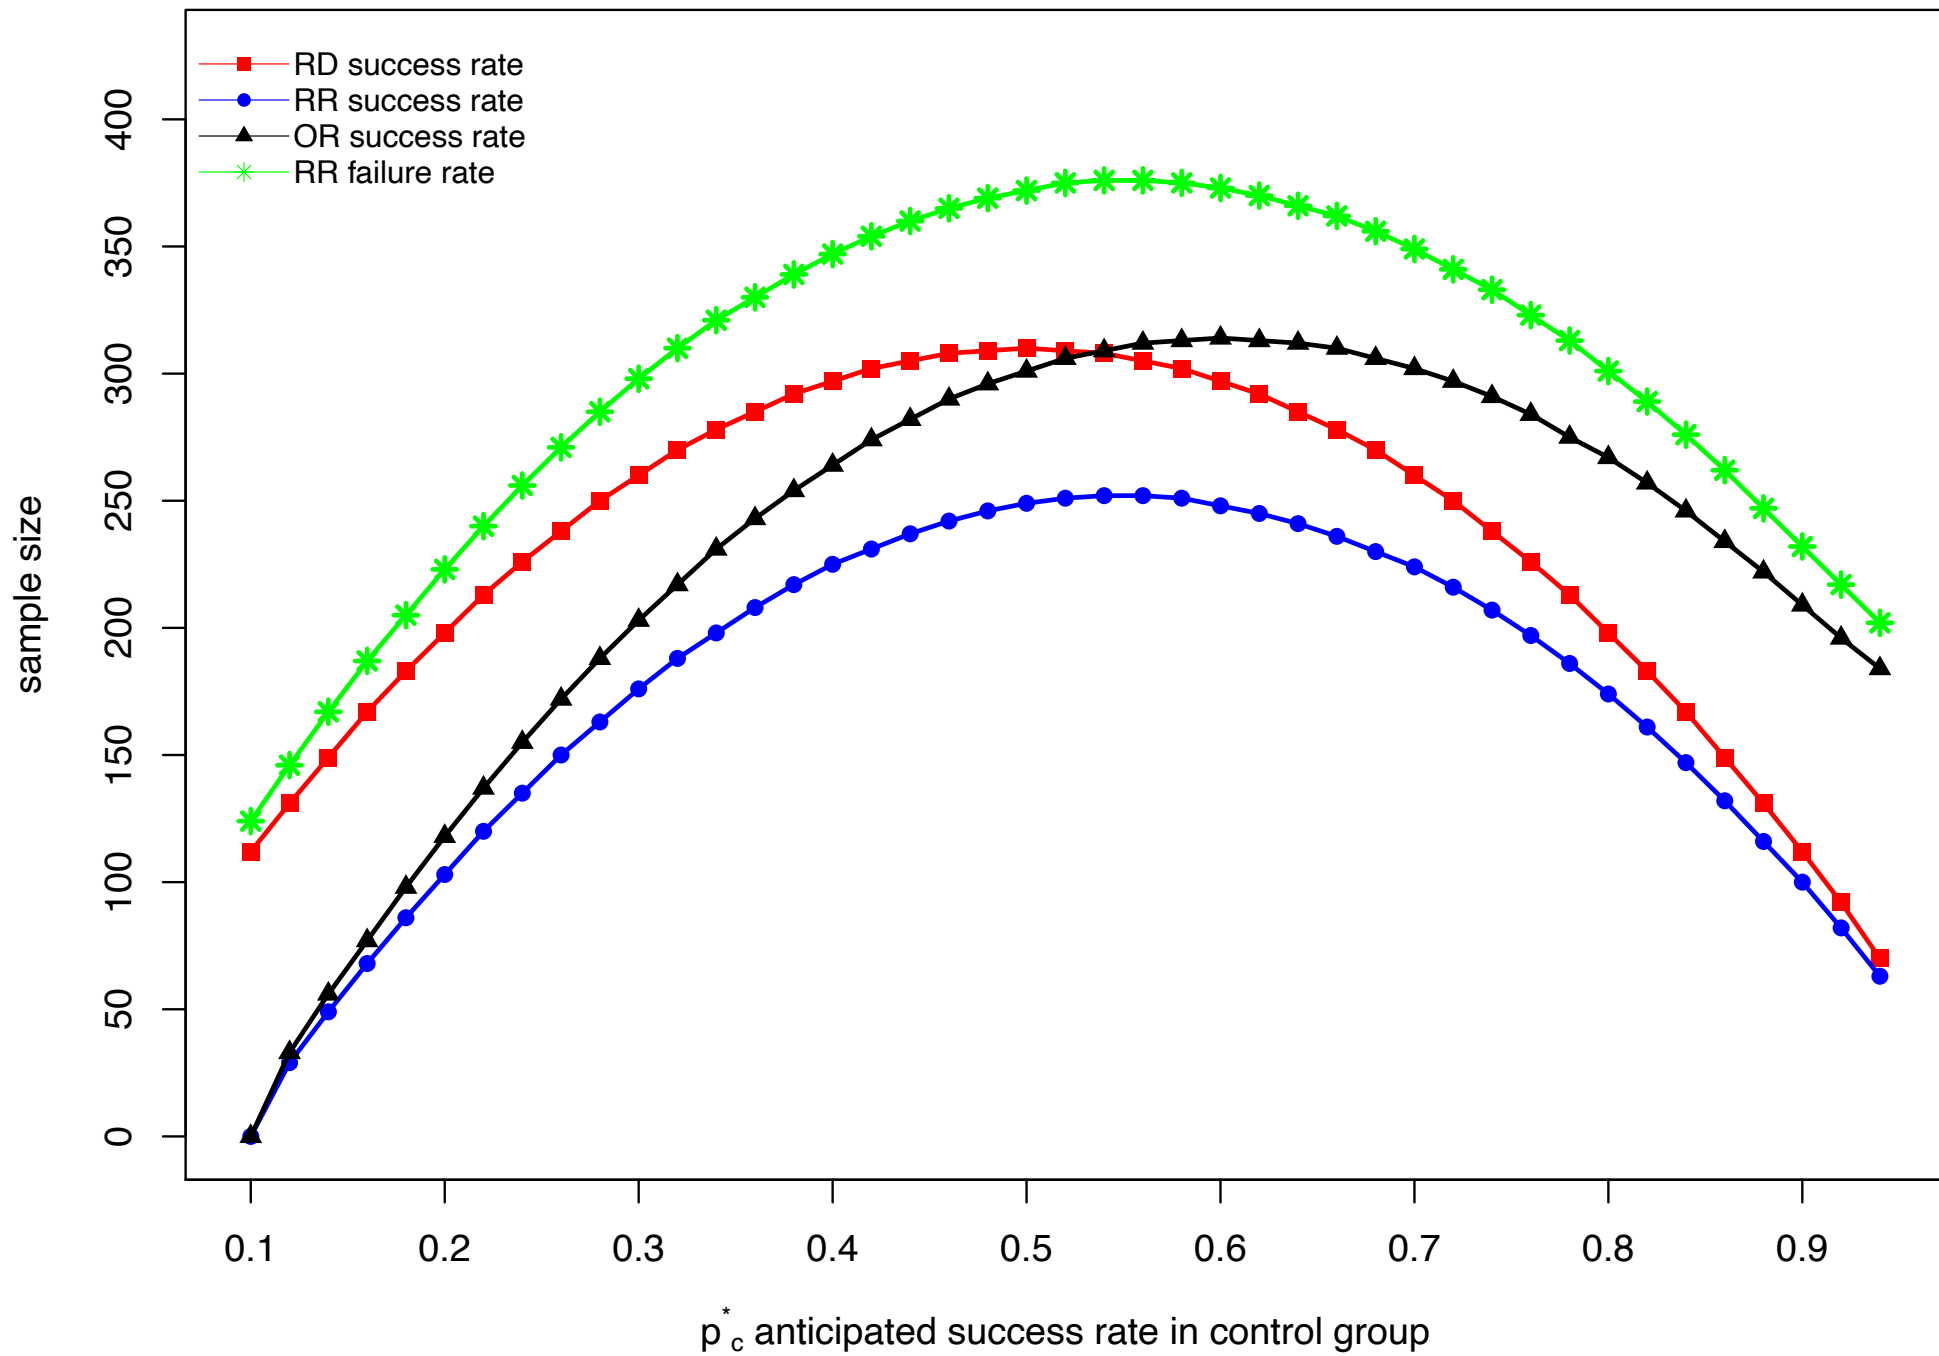

Figure S2. Results with  $p_t^* = p_c^*$ ,  $\delta_{RD} = -0.05$ , one-sided  $\alpha = 0.05$ , power=0.80

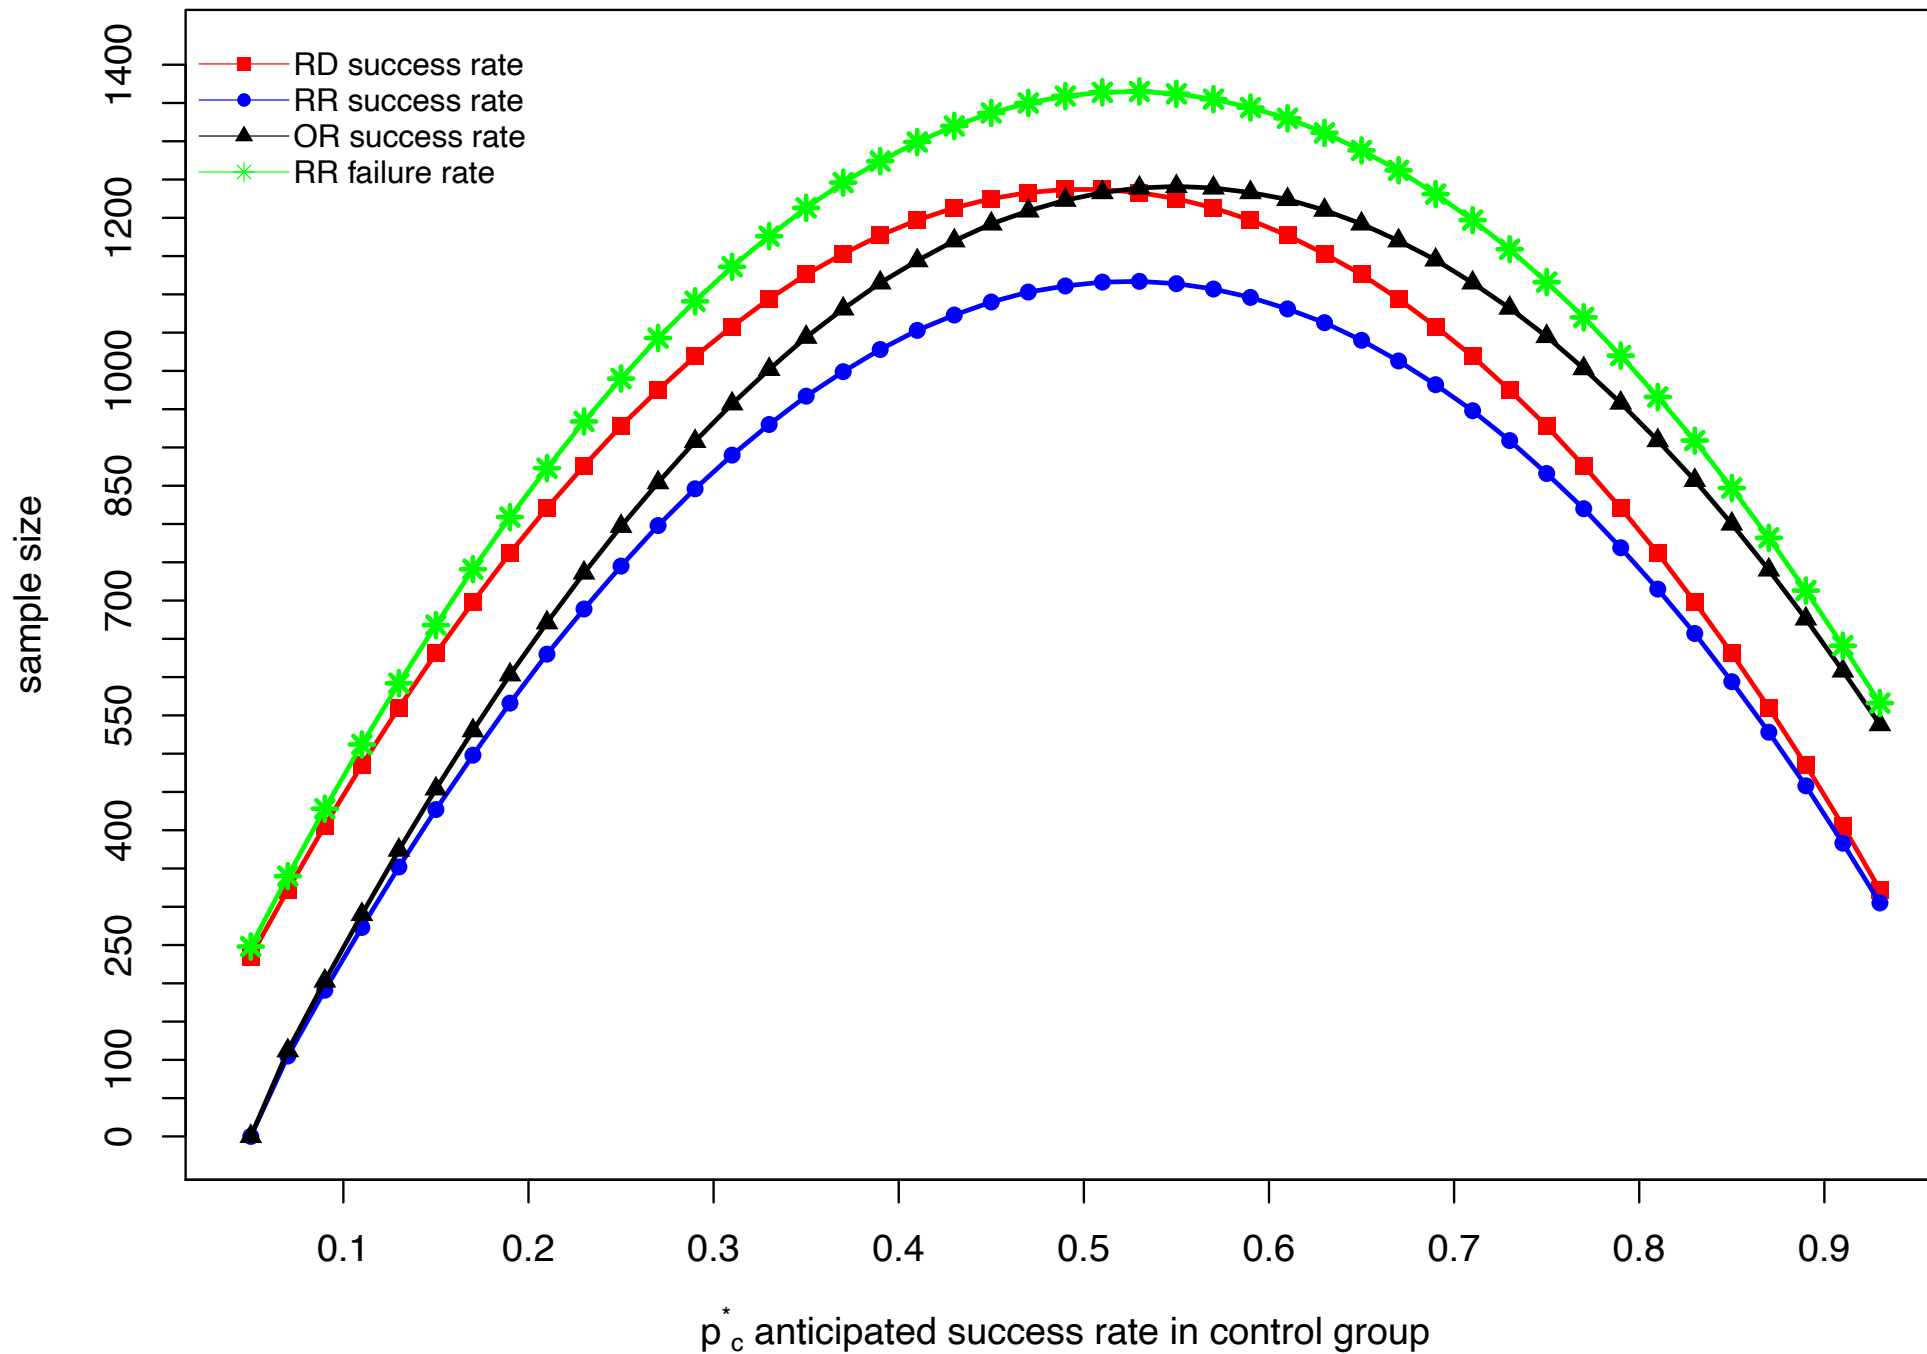

Figure S3. Results with  $p_t^* = p_c^*$ ,  $\delta_{RD} = -0.01$ , one-sided  $\alpha = 0.05$ , power=0.80

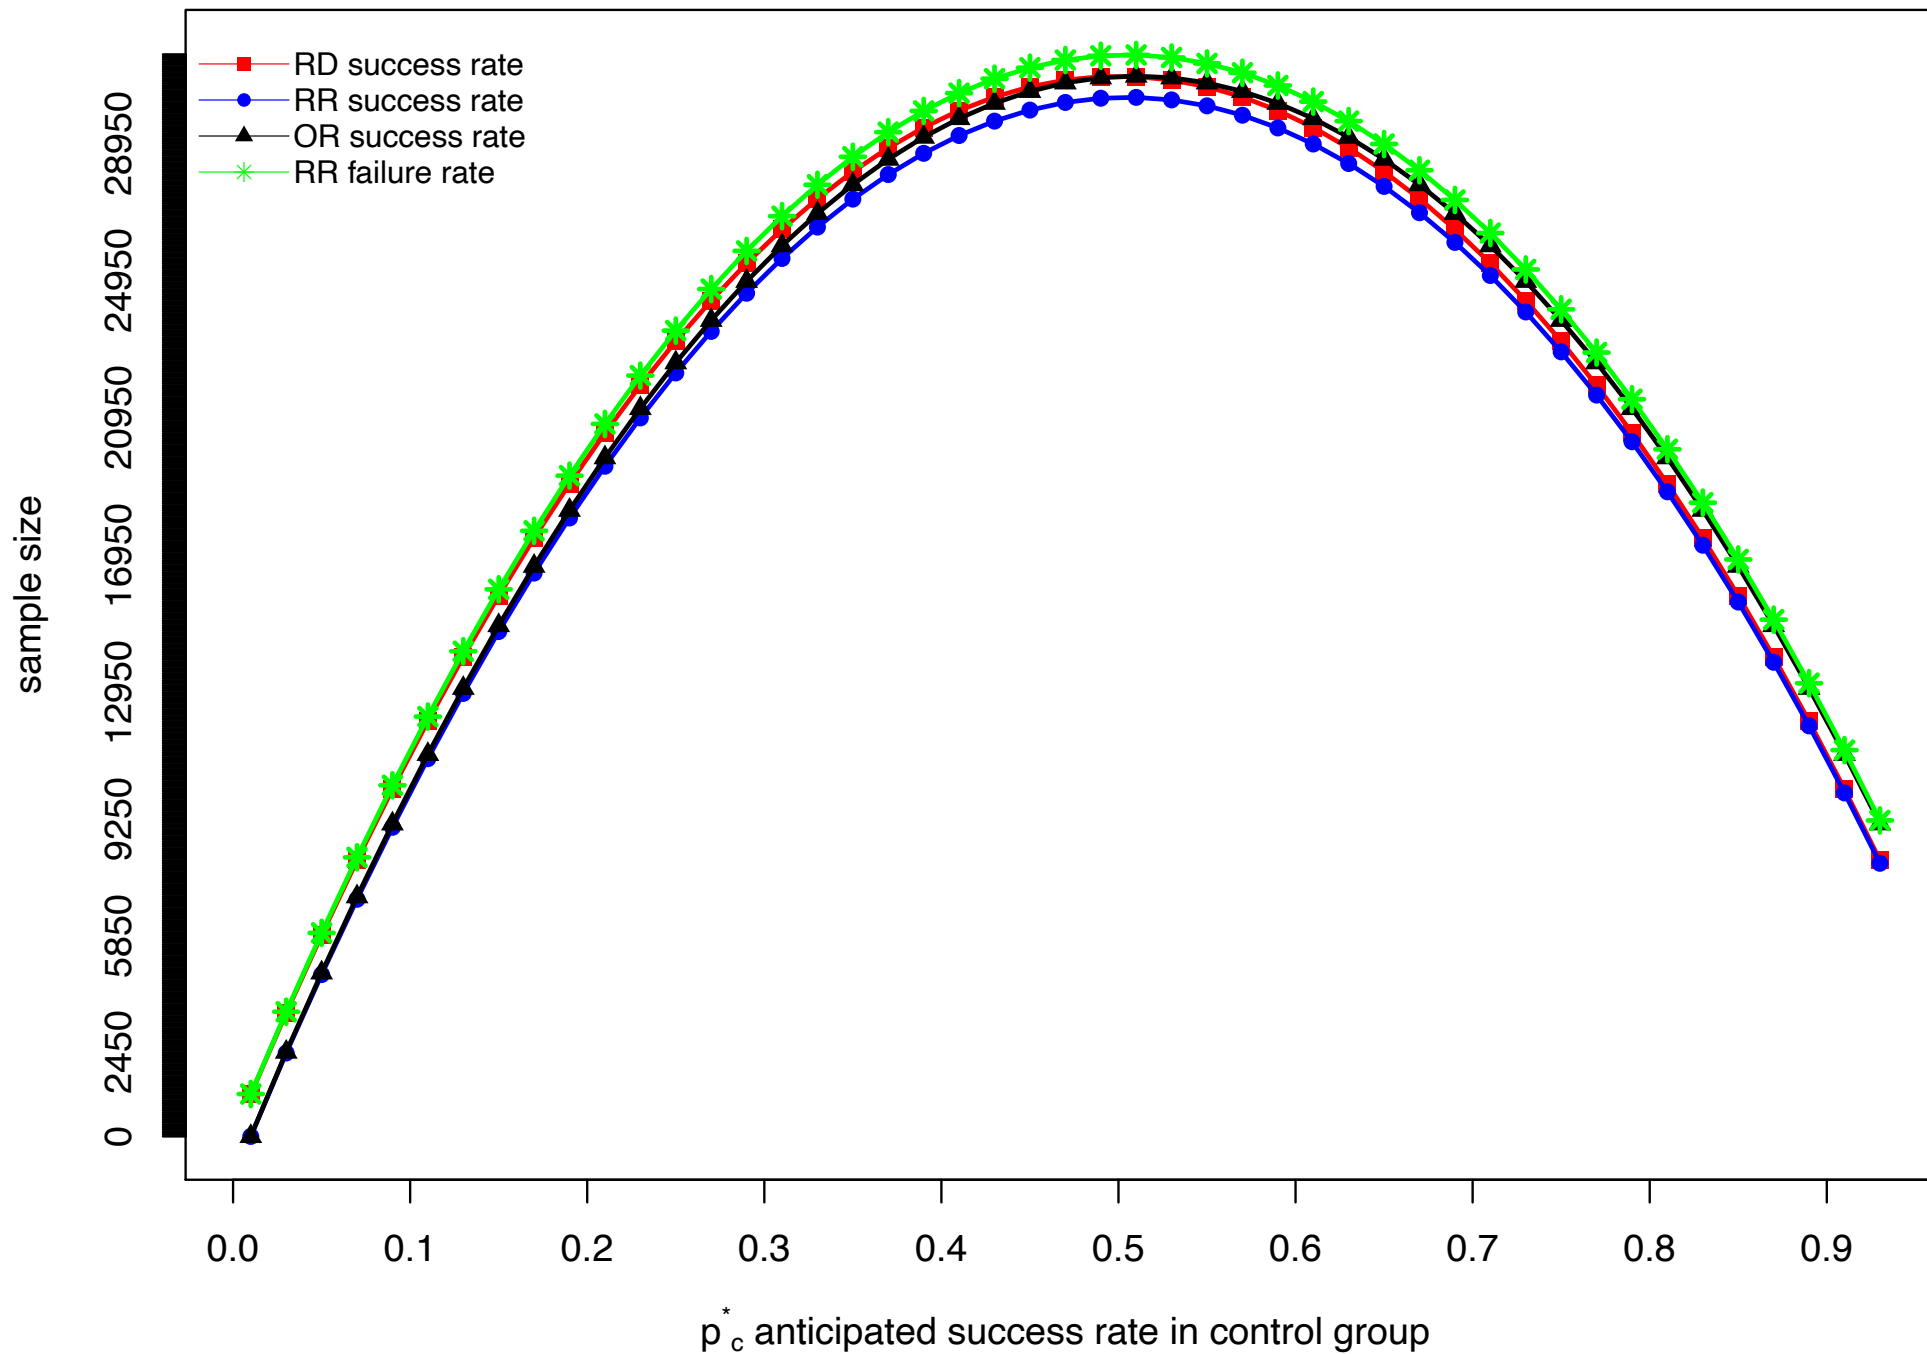

Figure S4. Rejection regions for power when switching using the anticipated control proportion

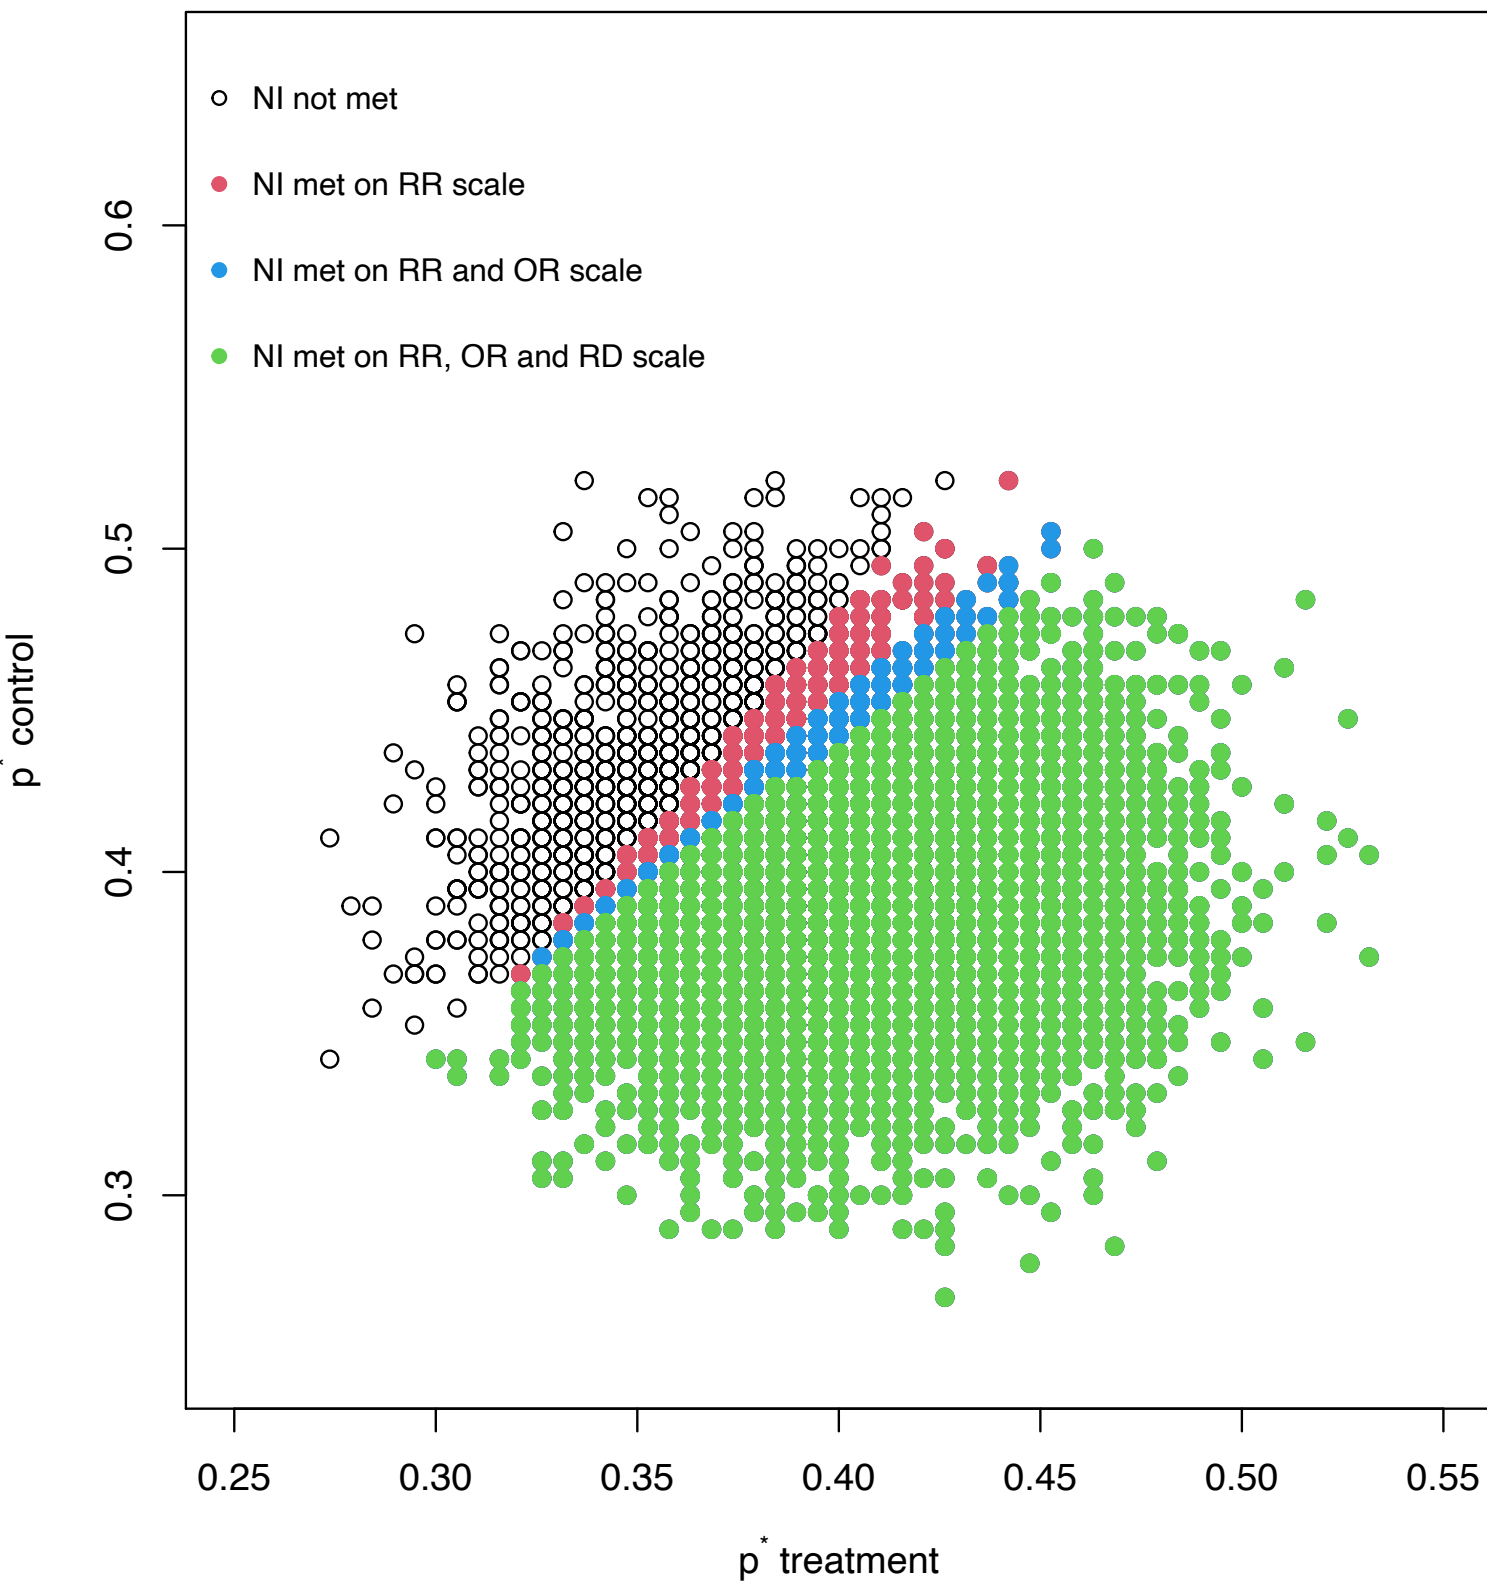

Figure S5. Rejection regions for type I error rate when switching using the anticipated control proportion

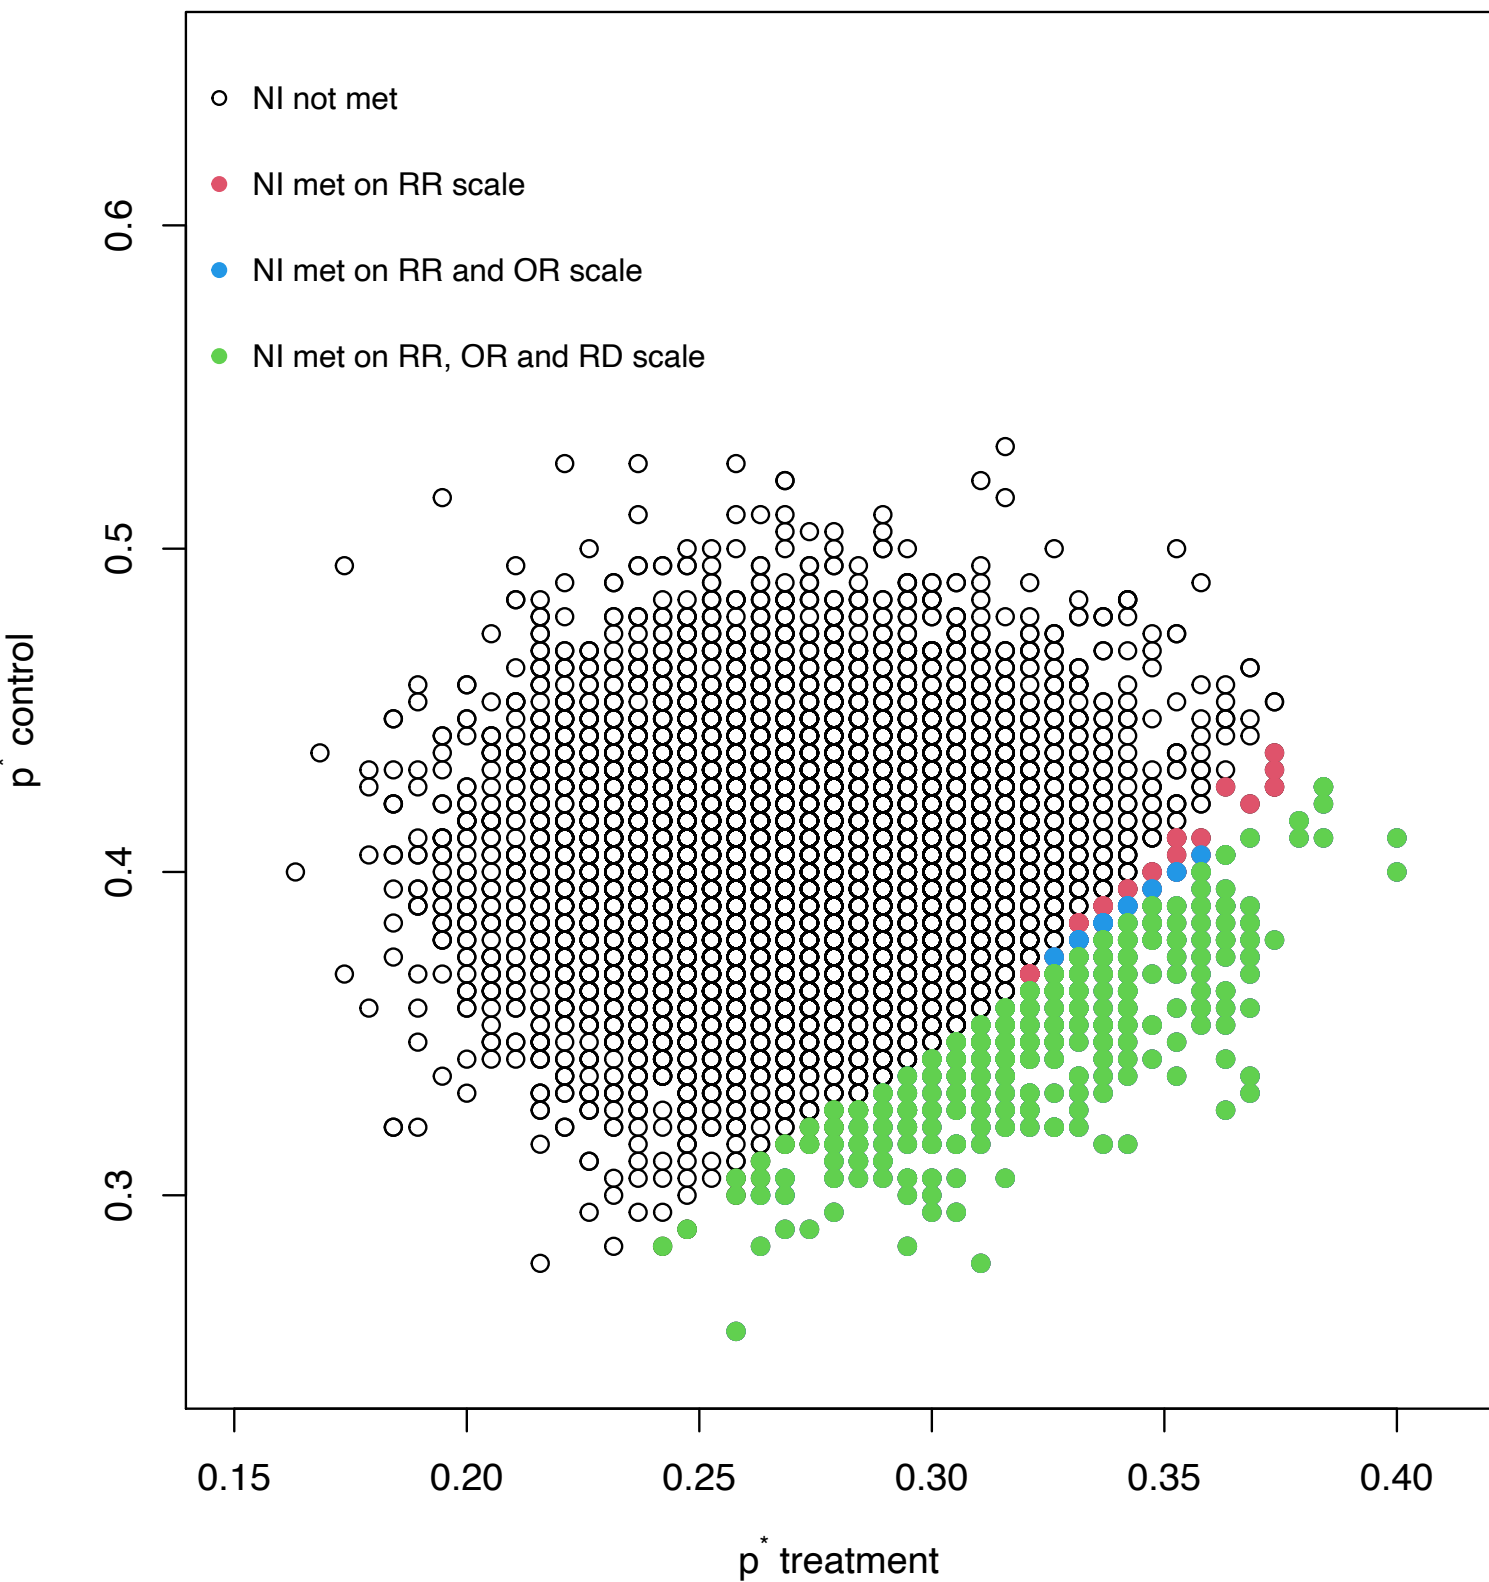

Figure S6. Rejection regions for power when switching using the observed control proportion

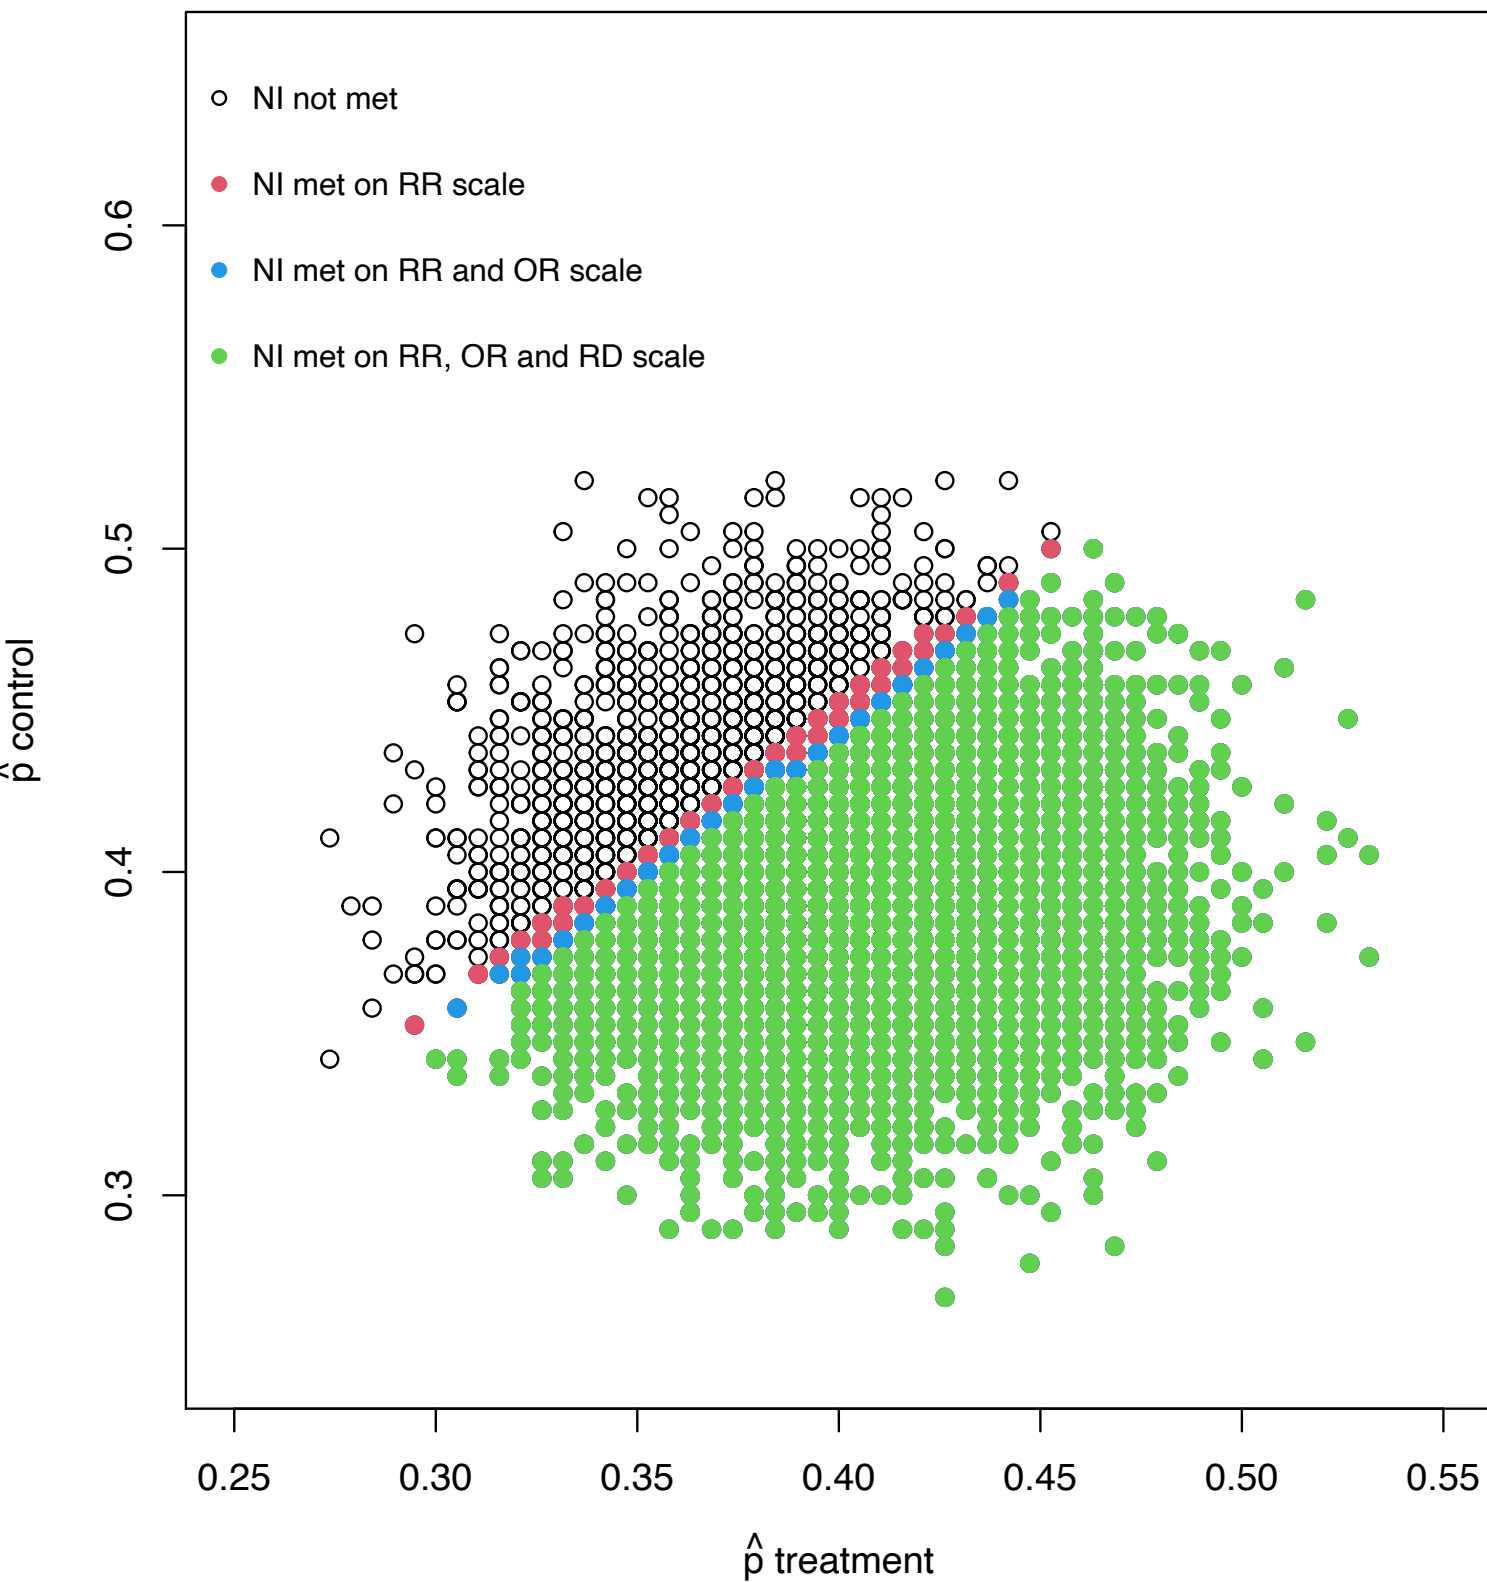

Figure S7. Rejection regions for type I error rate when switching using the observed control proportion

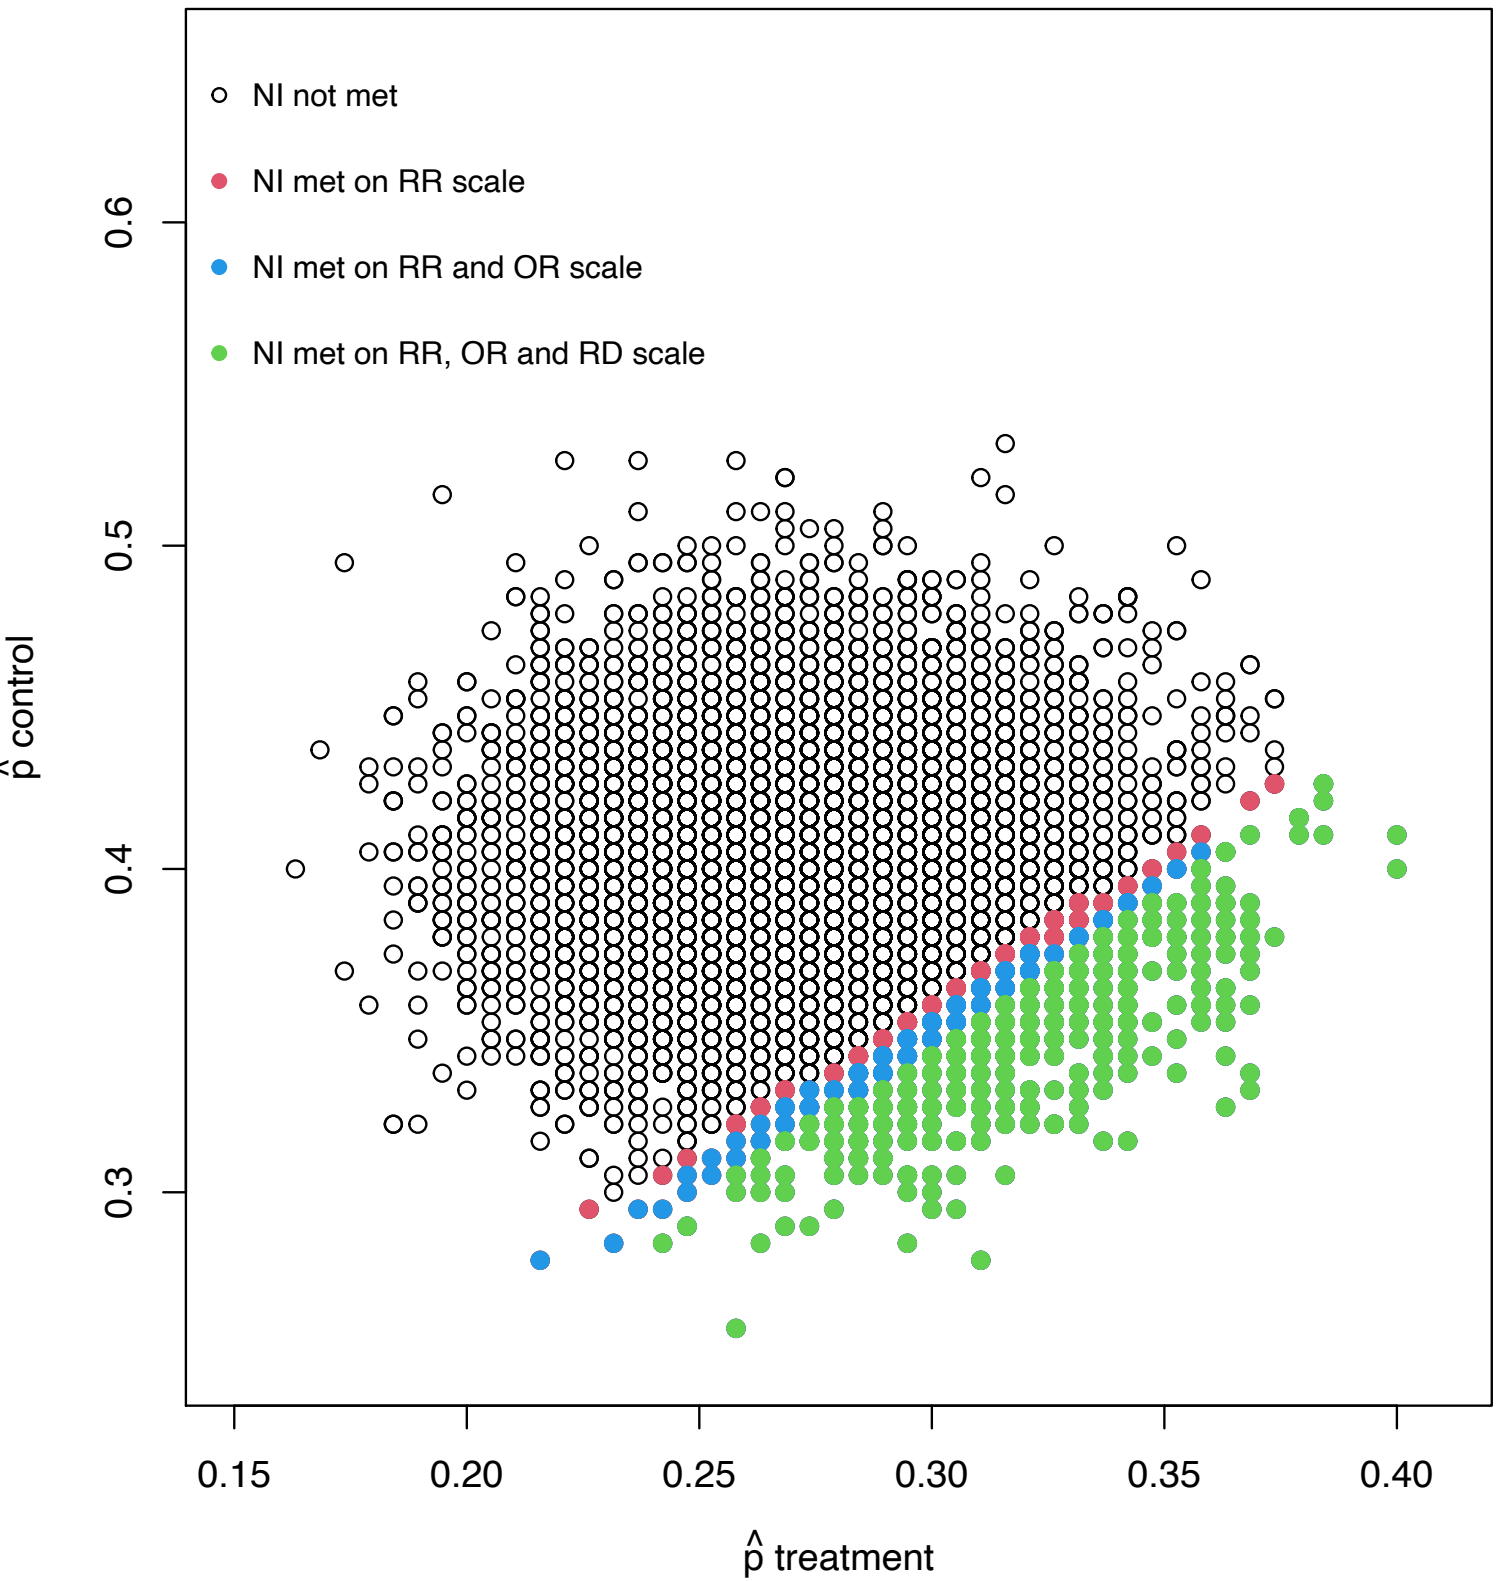

Figure S8. Rejection regions for power when switching using the anticipated control proportion scenario 1

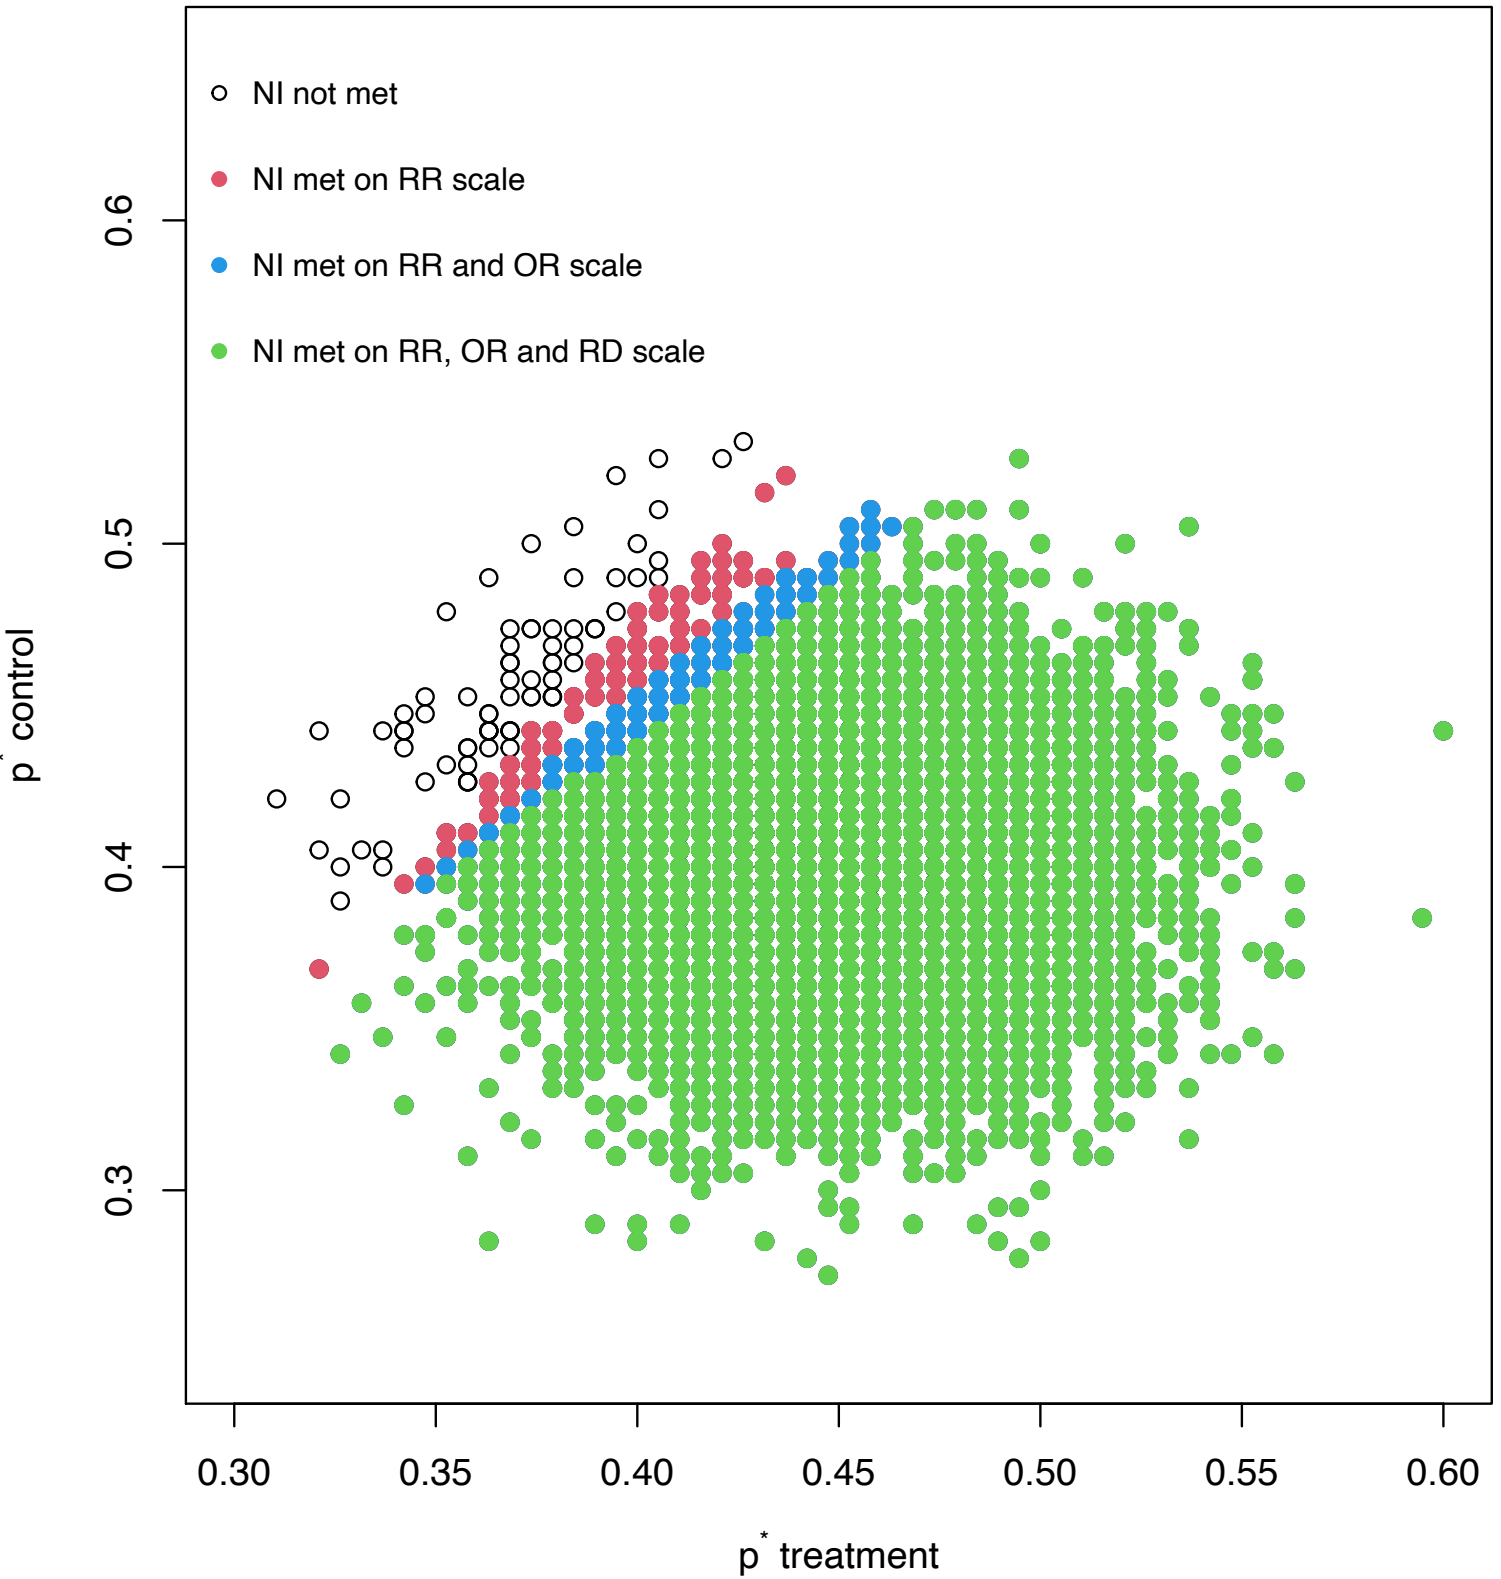



Figure S9. Rejection regions for power when switching using the anticipated control proportion scenario 2

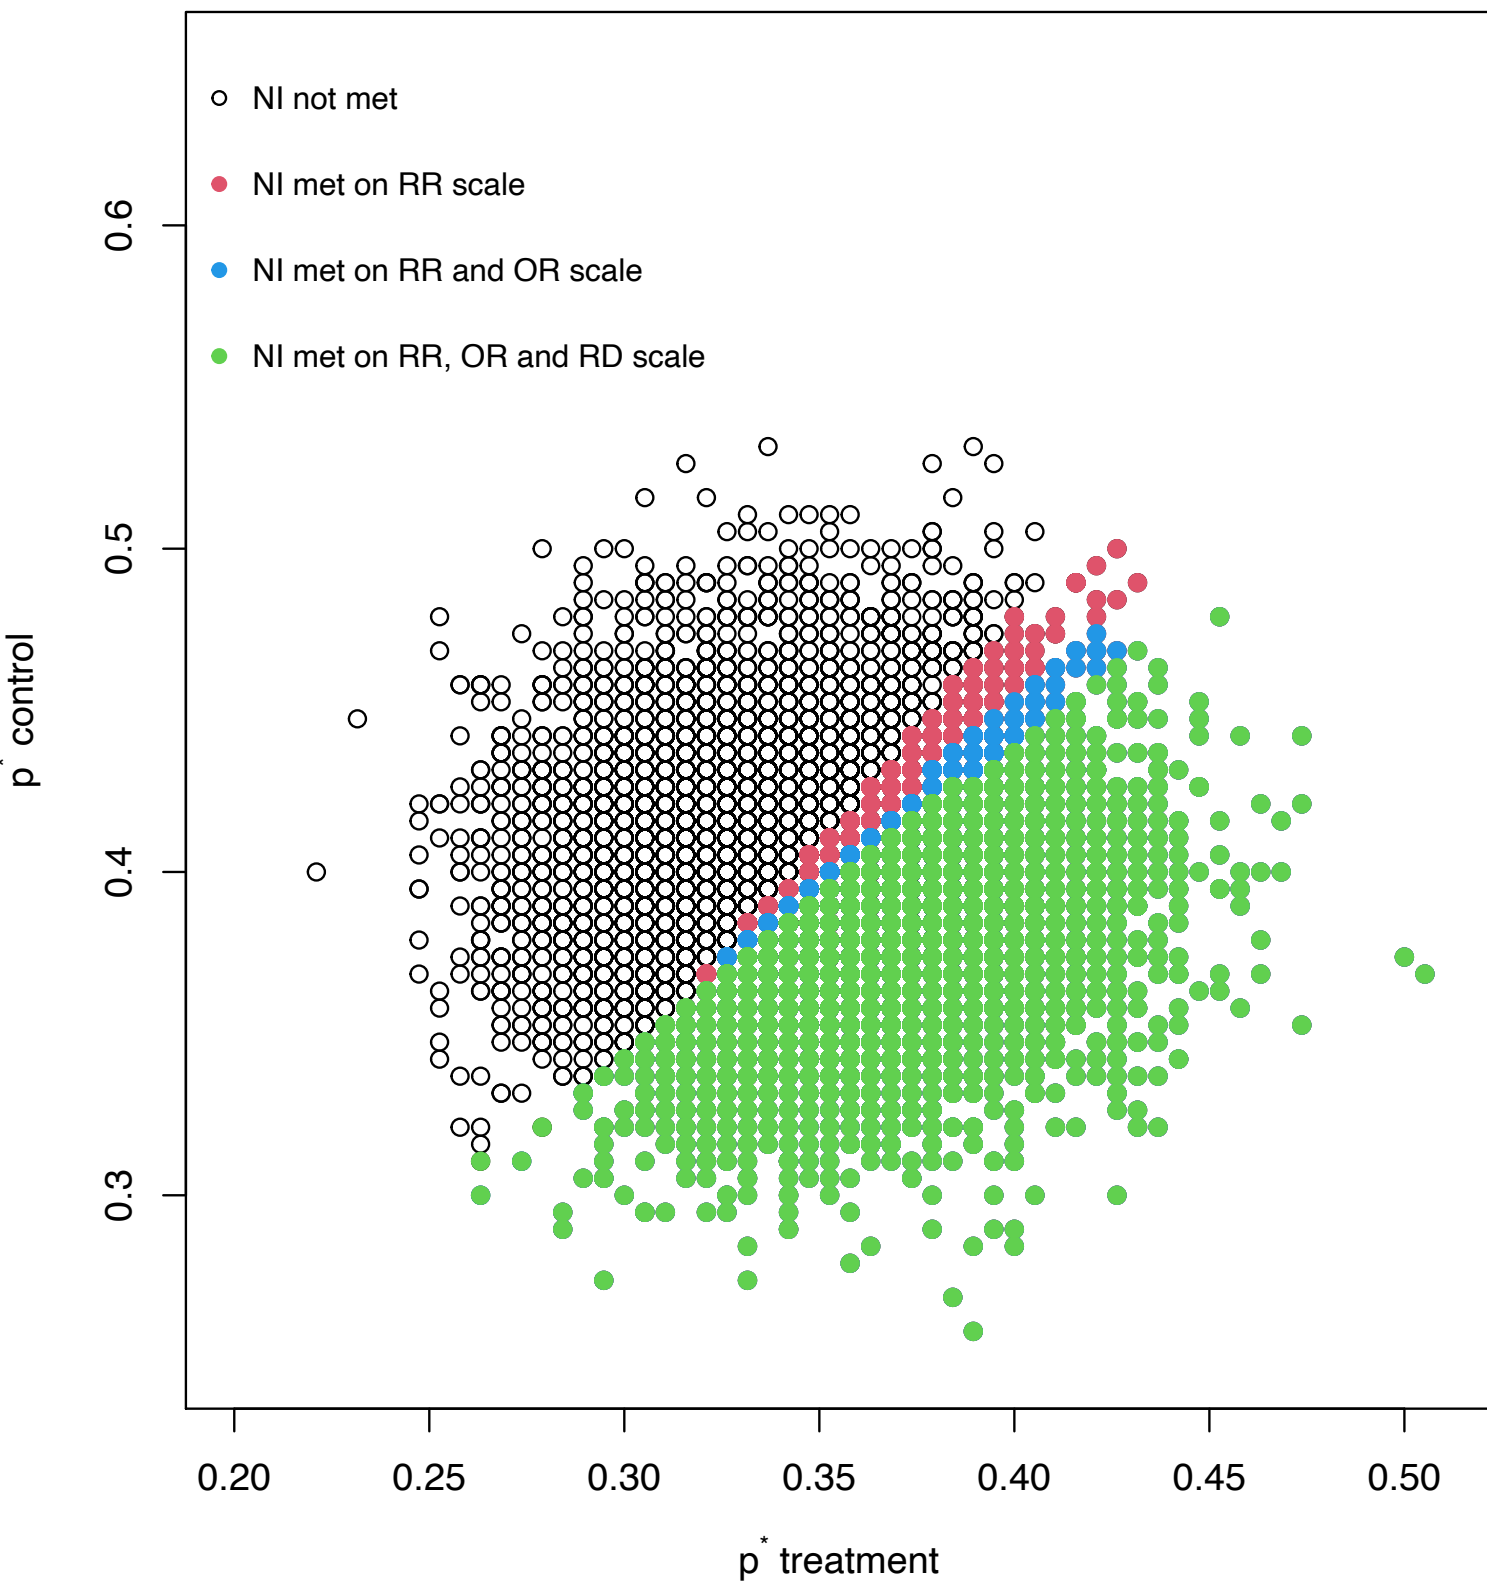

**Table S1.** Non-inferiority hypotheses and sample size formulas based on Z-tests for four different analysis scales.  $n$  represents the sample size required per arm.  $\delta_{RD}$ ,  $\delta_{RR}$ ,  $\delta_{OR}$  and  $\delta_{RR}^f$  represent the margin given on the RD, RR, OR scales with success rate and on the RR scale with failure rate, respectively.  $\alpha$  denotes the type I error rate,  $\beta$  indicates the type II error rate and  $z_{1-\alpha}$  ( $z_{1-\beta}$ ) is the lower  $\alpha$ -th ( $\beta$ -th) quantile of the standard normal distribution.

| RD                                                                               | RR (success rate)                                                                               | OR                                                                                      | RR (failure rate)                                                                                   |
|----------------------------------------------------------------------------------|-------------------------------------------------------------------------------------------------|-----------------------------------------------------------------------------------------|-----------------------------------------------------------------------------------------------------|
| $H_0 : p_t - p_c \leq \delta_{RD}$                                               | $H_0 : p_t/p_c \leq \delta_{RR}$                                                                | $H_0 : (\frac{p_t}{1-p_t})/(\frac{p_c}{1-p_c}) \leq \delta_{OR}$                        | $H_0 : (1-p_t)/(1-p_c) \geq \delta_{RR}^f$                                                          |
| $H_a : p_t - p_c > \delta_{RD}$                                                  | $H_a : p_t/p_c > \delta_{RR}$                                                                   | $H_a : (\frac{p_t}{1-p_t})/(\frac{p_c}{1-p_c}) > \delta_{OR}$                           | $H_a : (1-p_t)/(1-p_c) < \delta_{RR}^f$                                                             |
| $n_{RD} = \frac{2(z_{1-\alpha} + z_{1-\beta})^2 p_c^* (1-p_c^*)}{\delta_{RD}^2}$ | $n_{RR} = \frac{2(z_{1-\alpha} + z_{1-\beta})^2 \frac{(1-p_c^*)}{p_c^*}}{(\ln(\delta_{RR}))^2}$ | $n_{OR} = \frac{2(z_{1-\alpha} + z_{1-\beta})^2}{(\ln(\delta_{OR}))^2 p_c^* (1-p_c^*)}$ | $n_{RR}^f = \frac{2(z_{1-\alpha} + z_{1-\beta})^2 \frac{p_c^*}{(1-p_c^*)}}{(\ln(\delta_{RR}^f))^2}$ |

**Table S2.** Given margin on the RD scale ( $\delta_{RD}$  is negative here), mapping the NI margin to the RR, OR scales using anticipated control rate or observed control rate with success proportions ( $p_c^*$  and  $\hat{p}_c$ ) or failure proportions ( $(1 - p_c^*)$  and  $(1 - \hat{p}_c)$ ), respectively.  $\delta_{RR}$ ,  $\delta_{OR}$  and  $\delta_{RR}^f$  represent the margin given on the RR,OR scales with success rate and on the RR scale with failure rate, respectively.

| Target scale | Using anticipated control rate                                     | Using observed control rate                                                |
|--------------|--------------------------------------------------------------------|----------------------------------------------------------------------------|
| $RR$         | $\delta_{RR} = (p_c^* + \delta_{RD})/p_c^*$                        | $\delta_{RR} = (\hat{p}_c + \delta_{RD})/\hat{p}_c$                        |
| $OR$         | $\delta_{OR} = 1 + \frac{\delta_{RD}}{p_c^*(1-p_c^*-\delta_{RD})}$ | $\delta_{OR} = 1 + \frac{\delta_{RD}}{\hat{p}_c(1-\hat{p}_c-\delta_{RD})}$ |
| $RR^f$       | $\delta_{RR}^f = (1 - p_c^* - \delta_{RD})/(1 - p_c^*)$            | $\delta_{RR}^f = (1 - \hat{p}_c - \delta_{RD})/(1 - \hat{p}_c)$            |
